# Supplementary material for: Interrogation of a live-attenuated enterotoxigenic Escherichia coli vaccine highlights features unique to wild-type infection
Source: PubMed Central journal article supplement (PMC6713706; doi:10.1038/s41541-019-0131-7), 2019-08-28

## Supplementary figures

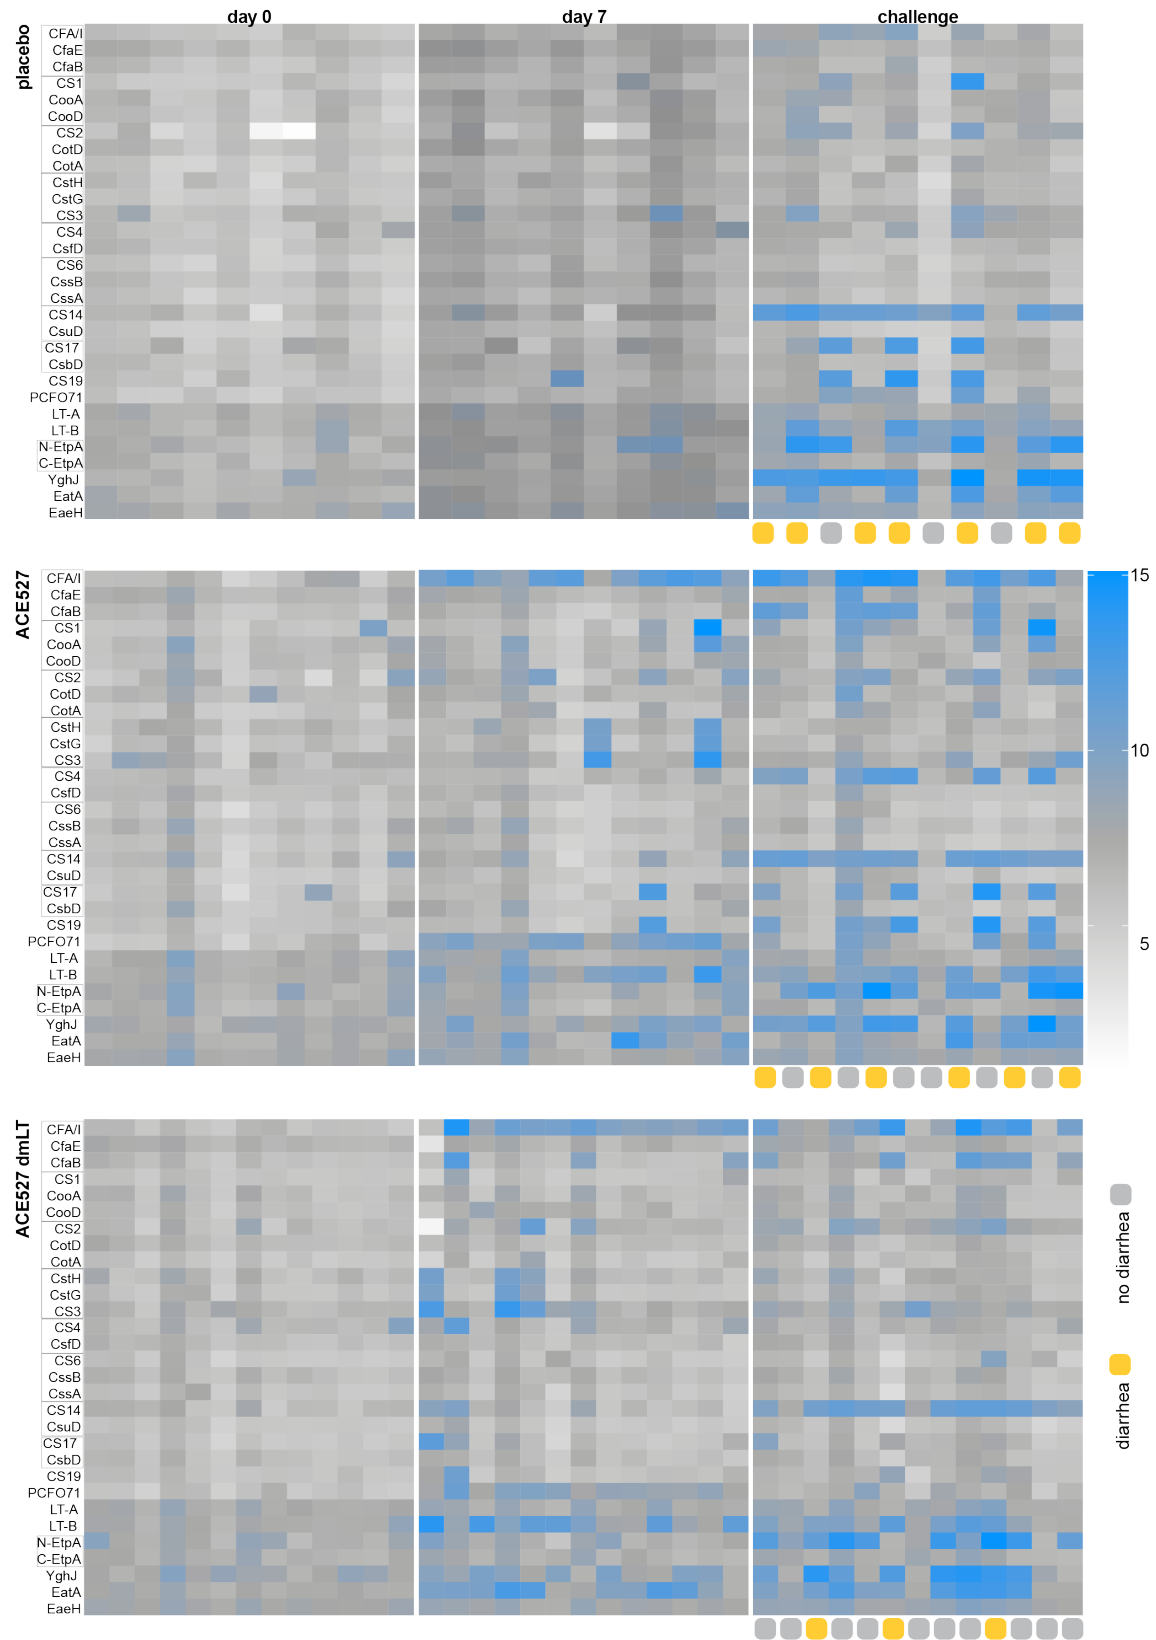

Supplementary figure 1

Antibody lymphocyte supernatant (ALS), IgA responses to recombinant antigens following vaccination with ACE527±dmLT, and challenge with H10407. Individual recombinant antigens are shown at left while individual volunteer data are arranged in columns. Data legend depicts log<sub>2</sub> values of array signal intensity.

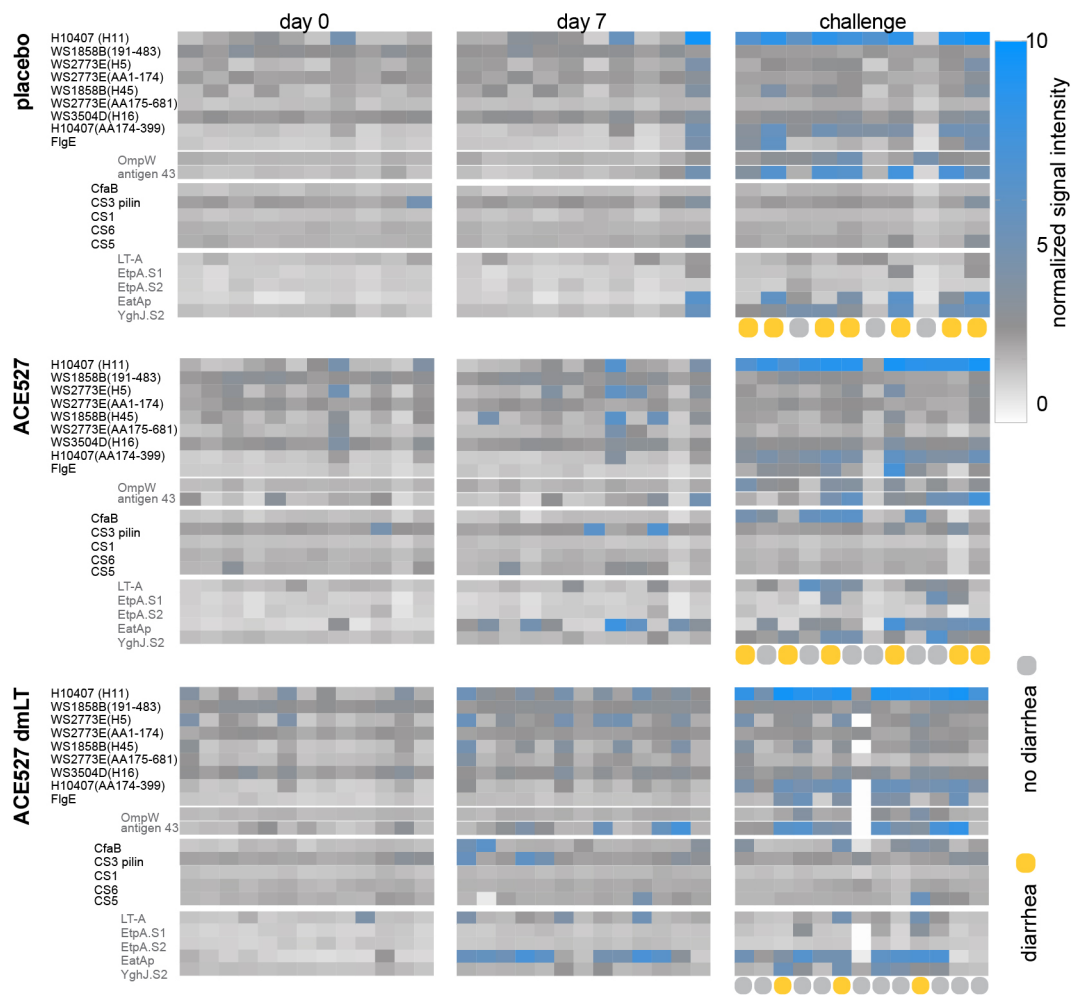

Supplementary figure 2.

Antibody lymphocyte supernatant (ALS) IgA responses to select IVTT antigens following vaccination with ACE527, ACE527 + dmLT, or placebo. Shown are responses prior to vaccination, day 7 post vaccination, and day 7 post challenge with ETEC H10407. Antigens are grouped by row according to function (flagellar antigens at top; followed by membrane proteins OmpW, and antigen 43; CF/CS colonization factor antigens; secreted proteins at bottom). Columns in each group represent individual volunteers (placebo n=10; ACE527 n=12; ACE527 +dmLT n=13). Volunteers experiencing diarrhea after challenge with ETEC H10407 are represented as yellow circles while those without diarrhea post challenge are shown as grey circles. Legend values at right indicate normalized signal intensity.

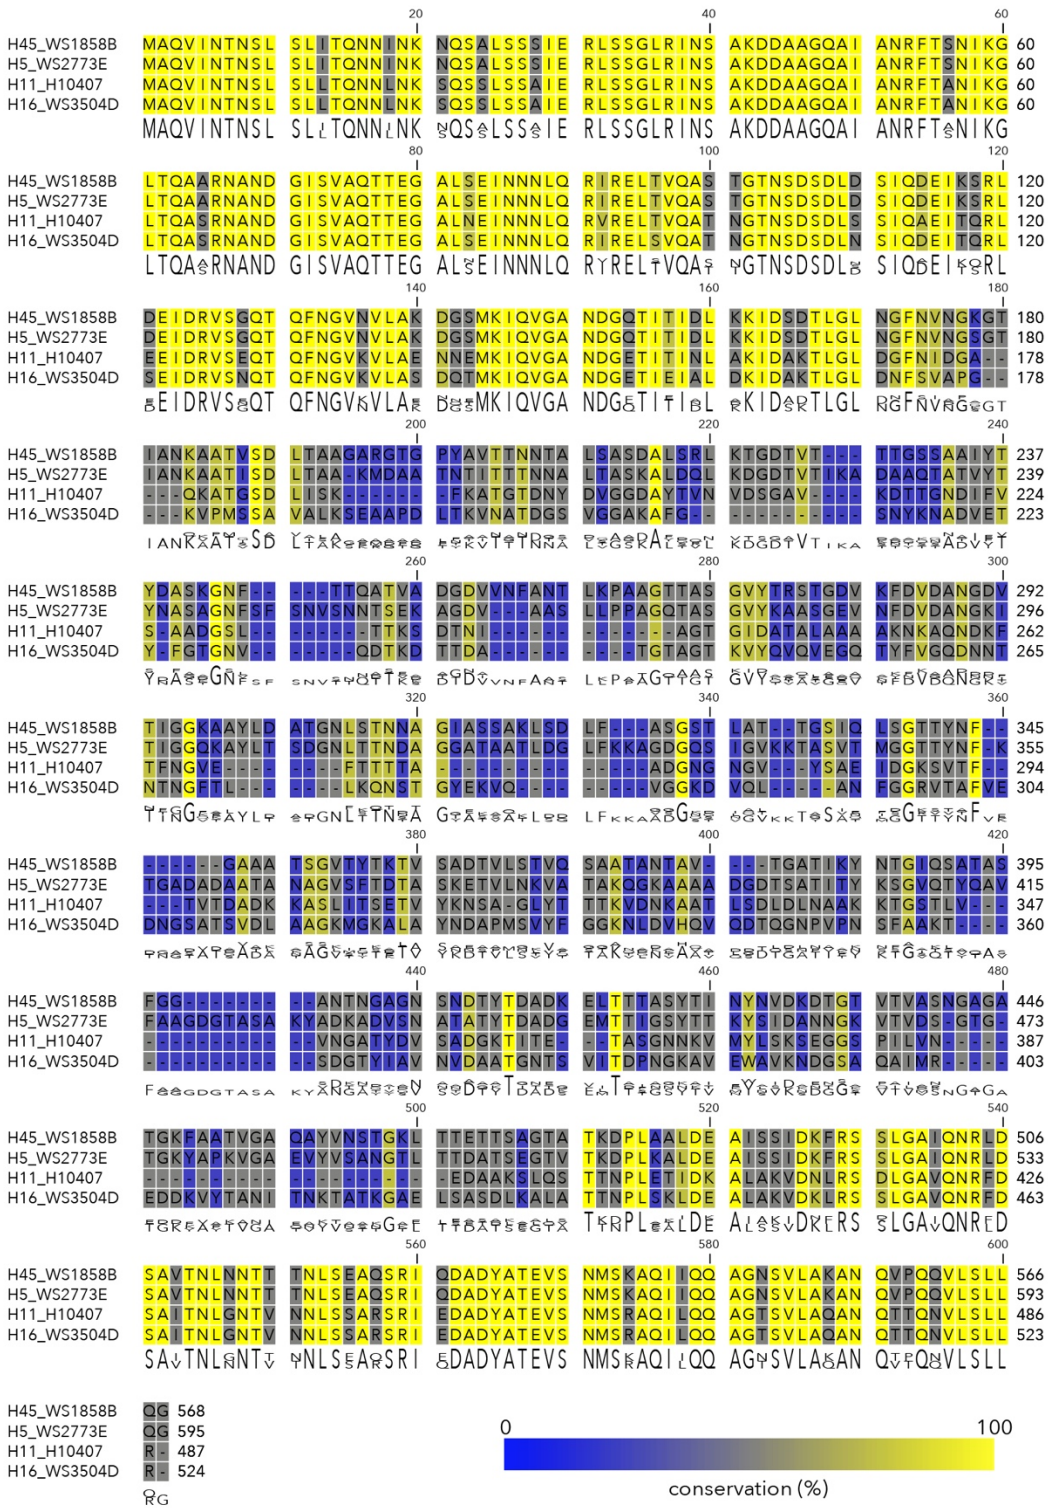

Supplementary figure 3.

MUSCLE[7] alignment of H10407 flagellin (H11 sequence) with flagellin (FlIC) peptides from parental ACE527 strains WS1858B (H45), WS2773E (H5), and WS3504D (H16). MUSCLE v3.8.31 is available at <http://www.drive5.com/muscle/>.

## Supplementary tables

### Supplementary table 1

| Supplementary table 1. H10407 challenge, ACE527 parental and vaccine strains                                                                                                                                                                                      |                                                                                                                                     |                               |           |
|-------------------------------------------------------------------------------------------------------------------------------------------------------------------------------------------------------------------------------------------------------------------|-------------------------------------------------------------------------------------------------------------------------------------|-------------------------------|-----------|
| strain                                                                                                                                                                                                                                                            | genotype                                                                                                                            | description                   | reference |
| live attenuated vaccine parents and constructs                                                                                                                                                                                                                    |                                                                                                                                     |                               |           |
| WS-2773E                                                                                                                                                                                                                                                          | O141:H5 CS5 CS6 LT ST EAST1                                                                                                         | (parental clinical isolate)   | [1]       |
| ACAM2022                                                                                                                                                                                                                                                          | O141:H5 CS5 CS6 $\Delta$ astA $\Delta$ eltAB $\Delta$ estA $\Delta$ ompF:: <i>Ptac-LTB</i> $\Delta$ aroC $\Delta$ phage             | vaccine isolate from WS-2773E | [1]       |
| WS-3504D                                                                                                                                                                                                                                                          | O39:H16 <sup>a</sup> CS2 CS3 LT ST EAST1 Ap <sup>r</sup>                                                                            | parental clinical isolate     | [1]       |
| ACAM2027                                                                                                                                                                                                                                                          | O39:H16 CS2 CS3 $\Delta$ astA $\Delta$ eltAB $\Delta$ estA $\Delta$ ompC:: <i>CS1</i> $\Delta$ ompF:: <i>Ptac-LTB</i> $\Delta$ aroC | vaccine isolate from WS-3504D | [1]       |
| WS-1858B                                                                                                                                                                                                                                                          | O71:H45 <sup>b</sup> CFA/I ST EAST1 Ap <sup>r</sup> Tp <sup>r</sup> Su <sup>r</sup>                                                 | parental clinical isolate     | [2]       |
| ACAM2025                                                                                                                                                                                                                                                          | O71:H45 CFA/I $\Delta$ astA $\Delta$ eltAB $\Delta$ estA $\Delta$ ompC $\Delta$ ompF:: <i>pLLTB</i>                                 | vaccine isolate from WS-1858B | [1]       |
| clinical challenge strain                                                                                                                                                                                                                                         |                                                                                                                                     |                               |           |
| H10407                                                                                                                                                                                                                                                            | O78:H11 CFA/I LT/ST/EAST1                                                                                                           | wild type-challenge strain    | [3]       |
| <sup>a</sup> Predicted by DNA sequence; Original serotype H12.<br><sup>b</sup> Predicted by DNA sequence, original serotype H <sup>-</sup> .<br><a href="https://cge.cbs.dtu.dk/services/SerotypeFinder/">https://cge.cbs.dtu.dk/services/SerotypeFinder/</a> [4] |                                                                                                                                     |                               |           |

### supplementary table 2 primers used in these studies

| primer designation | sequence 5'-3'          | description                                        | amplicon size (bp) | Reference: |
|--------------------|-------------------------|----------------------------------------------------|--------------------|------------|
| jf082213.1         | ATGTGCTTTG GCAGGTTAAT   | <i>eatA</i> forward primer                         | 1934               | [5]        |
| jf082213.2         | ATATCCAGTC AGCACCCACT   | <i>eatA</i> reverse primer                         | 1934               | [5]        |
| jf082213.3         | GGTTCAGGCA GTATCCAGAC   | <i>etpA</i> forward primer                         | 999                | [5]        |
| jf082213.4         | GGTGTAGCTG TCTGACCACA   | <i>etpA</i> reverse primer                         | 999                | [5]        |
| jf092313.7         | TACAAGCAGGATTACAACAC    | ST-H <u>reverse</u> primer bp 205-186 of st1b gene | 64                 | [6]        |
| jf092313.8         | AGTGGTCCTG AAAGCATG     | ST-H forward primer bp 146-159 of st1b             | 64                 | [6]        |
| jf092313.5         | TCTTTCCCCTCTTTTAGTCAG   | ST-P forward primer                                | 166                | [6]        |
| jf092313.6         | ACAGGCAGGA TTACAACAAA G | ST-P reverse primer                                | 166                | [6]        |
| jf092313.3         | ACGGCGTTAC TATCCTCTC    | LT-forward primer binds 31-49 of LT-B gene         | 274                | [6]        |
| jf092313.4         | TGGTCTCGGTCAGATATGTG    | LT-reverse primer binds 304-285 of LT-B gene       | 274                | [6]        |

Supplementary table 3 genetic composition of ACE527 vaccine strains and parents

| Supplementary table 3. genetic composition of ACE527 vaccine strains and parents <sup>1</sup> |         |          |         |          |         |          |
|-----------------------------------------------------------------------------------------------|---------|----------|---------|----------|---------|----------|
| gene/locus                                                                                    | WS2773E | ACAM2022 | WS1858B | ACAM2025 | WS3504D | ACAM2027 |
| colonization factors                                                                          |         |          |         |          |         |          |
| <i>cfaA</i>                                                                                   |         |          | +       | +        |         |          |
| <i>cfaB</i>                                                                                   |         |          | +       | +        |         |          |
| CS1                                                                                           |         |          |         |          |         | +        |
| CS2                                                                                           |         |          |         |          | +       | +        |
| CS3                                                                                           |         |          |         |          | +       | +        |
| CS5                                                                                           | +       | +        |         |          |         |          |
| CS6                                                                                           | +       | +        |         |          |         |          |
| CS21                                                                                          |         |          | +       | +        | +       |          |
| toxins                                                                                        |         |          |         |          |         |          |
| <i>eltA</i>                                                                                   | +       |          |         |          | +       |          |
| <i>eltB</i>                                                                                   | +       | +        |         | +        | +       | +        |
| <i>estH</i>                                                                                   | +       |          |         |          | +       |          |
| <i>astA</i>                                                                                   | +       |          |         |          | +       |          |
| <i>estP</i>                                                                                   |         |          |         |          |         |          |
| secreted virulence antigens                                                                   |         |          |         |          |         |          |
| <i>etpBAC</i>                                                                                 |         |          | +       |          | +       |          |
| <i>eatA</i>                                                                                   | +       | +        | +       |          | +       | +        |
| <i>yghJ</i>                                                                                   | +       | +        | +       | +        | +       | +        |
| <i>cexE</i>                                                                                   |         |          | +       | +        |         |          |
| <i>clyA</i>                                                                                   | +       | +        | +       | +        | +       | +        |
| cell surface antigens                                                                         |         |          |         |          |         |          |
| <i>tia</i>                                                                                    |         |          |         |          |         |          |
| <i>tibA</i>                                                                                   |         |          |         |          |         |          |
| <i>fimH</i>                                                                                   | +       | +        | +       | +        |         |          |
| <i>fimA</i>                                                                                   | +       | +        | +       | +        |         |          |
| <i>ecpA</i>                                                                                   | +       | +        |         |          |         |          |
| antigen 43                                                                                    | +       | +        | +       | +        | +       | +        |
| motility                                                                                      |         |          |         |          |         |          |
| <i>fliC</i>                                                                                   | +       | +        | +       | +        | +       | +        |
| <i>flgE</i>                                                                                   | +       | +        | +       | +        | +       | +        |
| toxin secretion                                                                               |         |          |         |          |         |          |
| T2SS <sup>2</sup> (Gsp)                                                                       | +       | +        | +       | +        | +       | +        |
| <i>toIC</i>                                                                                   | +       | +        | +       | +        | +       | +        |

<sup>1</sup>from whole genome sequence analysis of ACE527 parents and vaccine strains using RASTtk [28]

<sup>2</sup>T2SS = type 2 secretion system General Secretion Pathway genes *pppA* through *gspM*

### Supplementary references

1. Turner AK, Stephens JC, Beavis JC, et al. Generation and characterization of a live attenuated enterotoxigenic *Escherichia coli* combination vaccine expressing six colonization factors and heat-labile toxin subunit B. *Clin Vaccine Immunol* **2011**; 18:2128-35.
2. Turner AK, Beavis JC, Stephens JC, et al. Construction and phase I clinical evaluation of the safety and immunogenicity of a candidate enterotoxigenic *Escherichia coli* vaccine strain expressing colonization factor antigen CFA/I. *Infect Immun* **2006**; 74:1062-71.
3. Evans DJ, Jr., Evans DG. Three characteristics associated with enterotoxigenic *Escherichia coli* isolated from man. *Infect Immun* **1973**; 8:322-8.
4. Joensen KG, Tetzschner AM, Iguchi A, Aarestrup FM, Scheutz F. Rapid and Easy In Silico Serotyping of *Escherichia coli* Isolates by Use of Whole-Genome Sequencing Data. *J Clin Microbiol* **2015**; 53:2410-26.
5. Del Canto F, Valenzuela P, Cantero L, et al. Distribution of Classical and Nonclassical Virulence Genes in Enterotoxigenic *Escherichia coli* Isolates from Chilean Children and tRNA Gene Screening for Putative Insertion Sites for Genomic Islands. *J Clin Microbiol* **2011**; 49:3198-203.
6. Rodas C, Iniguez V, Qadri F, Wiklund G, Svennerholm AM, Sjoling A. Development of multiplex PCR assays for detection of enterotoxigenic *Escherichia coli* colonization factors and toxins. *J Clin Microbiol* **2009**; 47:1218-20.
7. Edgar RC. MUSCLE: a multiple sequence alignment method with reduced time and space complexity. *BMC Bioinformatics* **2004**; 5:113.

# PCR Results for EatA and EtpA

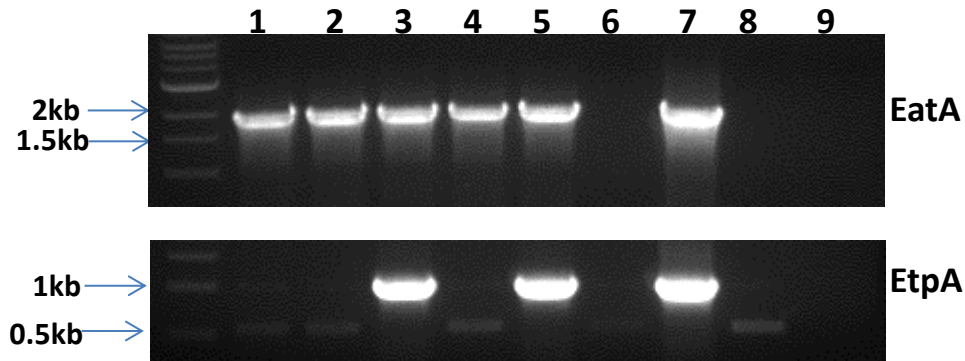

| Well # | jf # | Sample ID | Well # | jf #    | Sample ID        |
|--------|------|-----------|--------|---------|------------------|
| 1      | 2864 | WS2773E   | 6      | 2904    | ACAM2025         |
| 2      | 2900 | ACAM2022  | 7      | H10407  | Positive control |
| 3      | 2866 | WS3504D   | 8      | MG-1655 | Negative control |
| 4      | 2902 | ACAM2027  | 9      | Water   | Negative control |
| 5      | 2862 | WS1858B   |        |         |                  |

DNA template: genomic DNA

Primers: EatA (082213. 1&2) and EtpA (082213. 3&4)

Products' size: EatA=1934bp EtpA=999bp

8/27-28/18

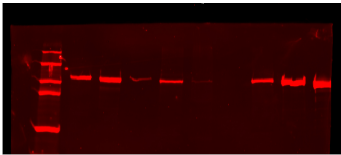



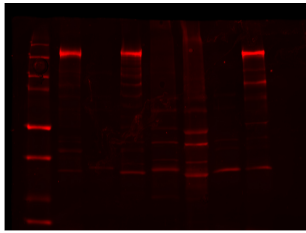

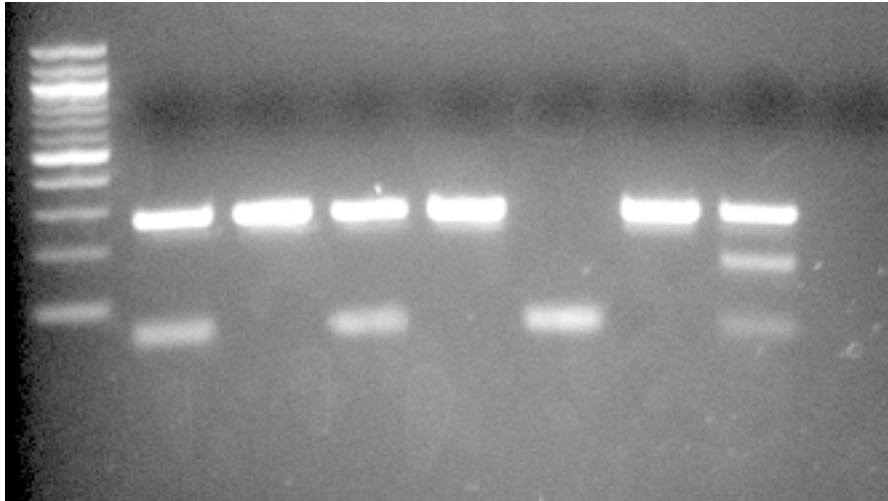

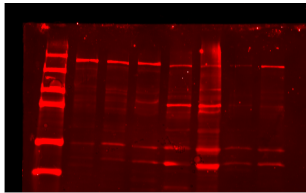

Supplement: 41541_2019_131_MOESM1_ESM.pdf [file 41541_2019_131_MOESM1_ESM.pdf]
